# Supplementary material
Source: publisher figshare collection journal article supplement (https://geolsoc.figshare.com/ndownloader/files/28692045)
Supplement: Supplementary file 1 [file 28692045]

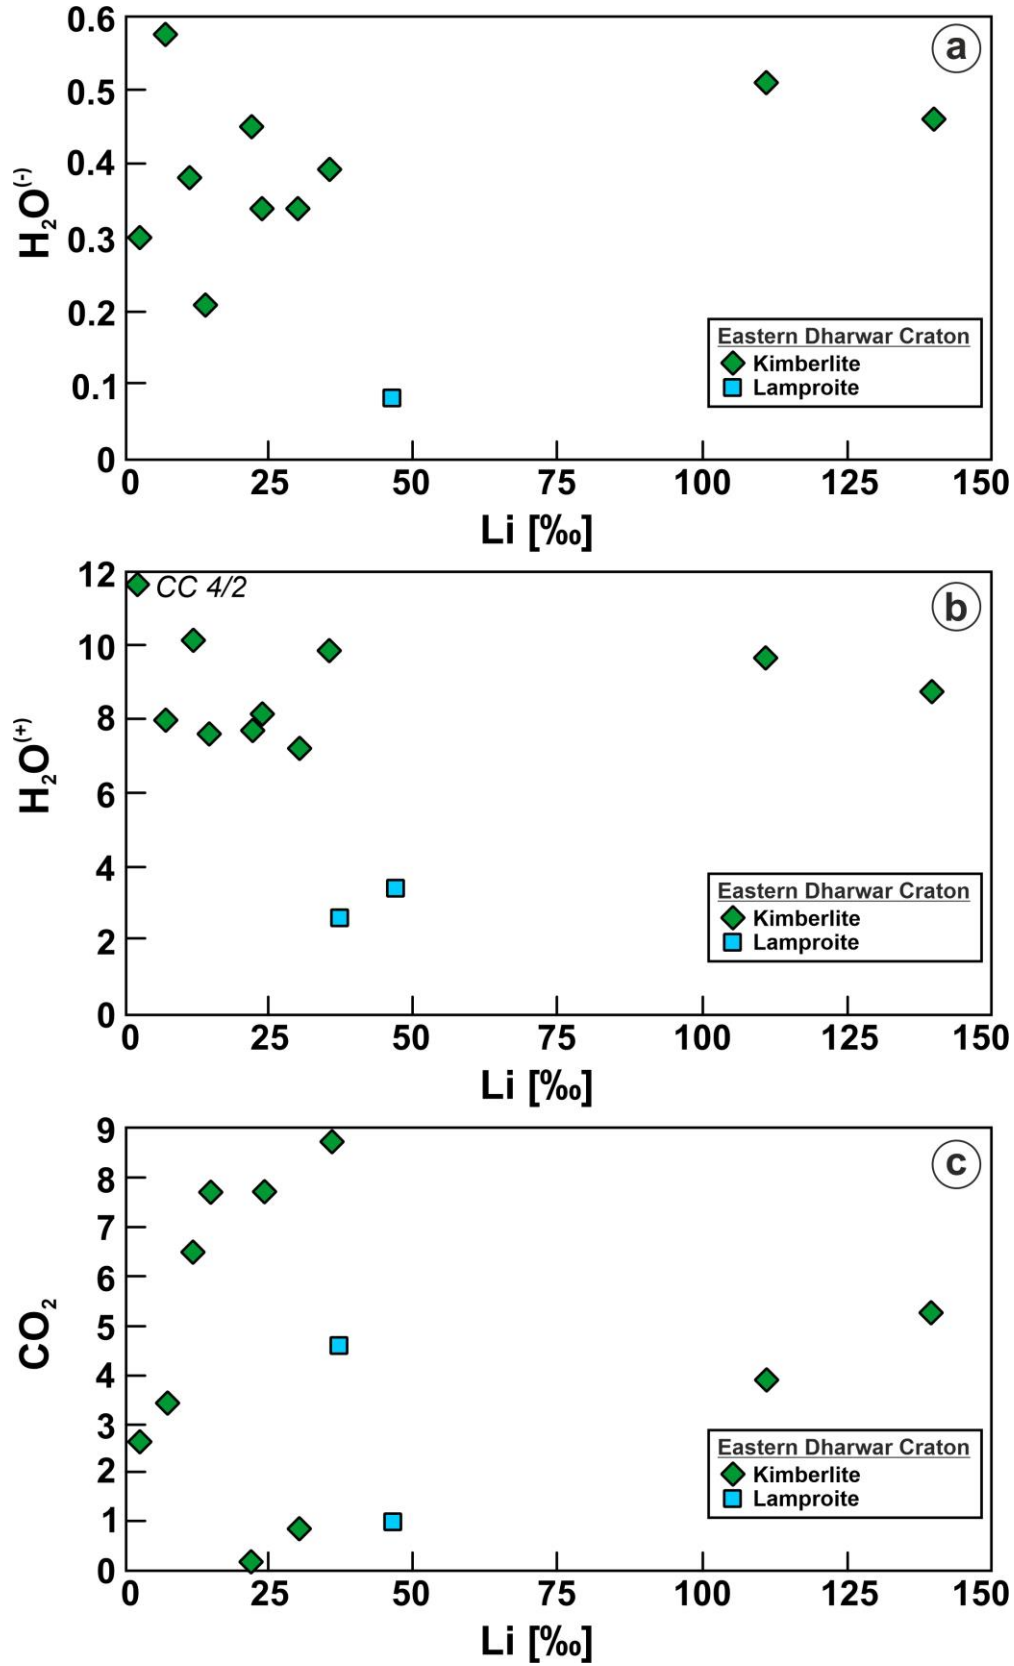

**Fig. S1.** Li v.  $H_2O^{(-)}$  (a), Li v.  $H_2O^{(+)}$  (b) and Li v.  $CO_2$  (c) diagram for studied kimberlites and lamproites from the Eastern Dharwar Craton.
